# Supplementary material
Source: PubMed Central journal article supplement (PMC7611226)
Supplement: EMS128702-supplement-1.pdf [file EMS128702-supplement-1.pdf]

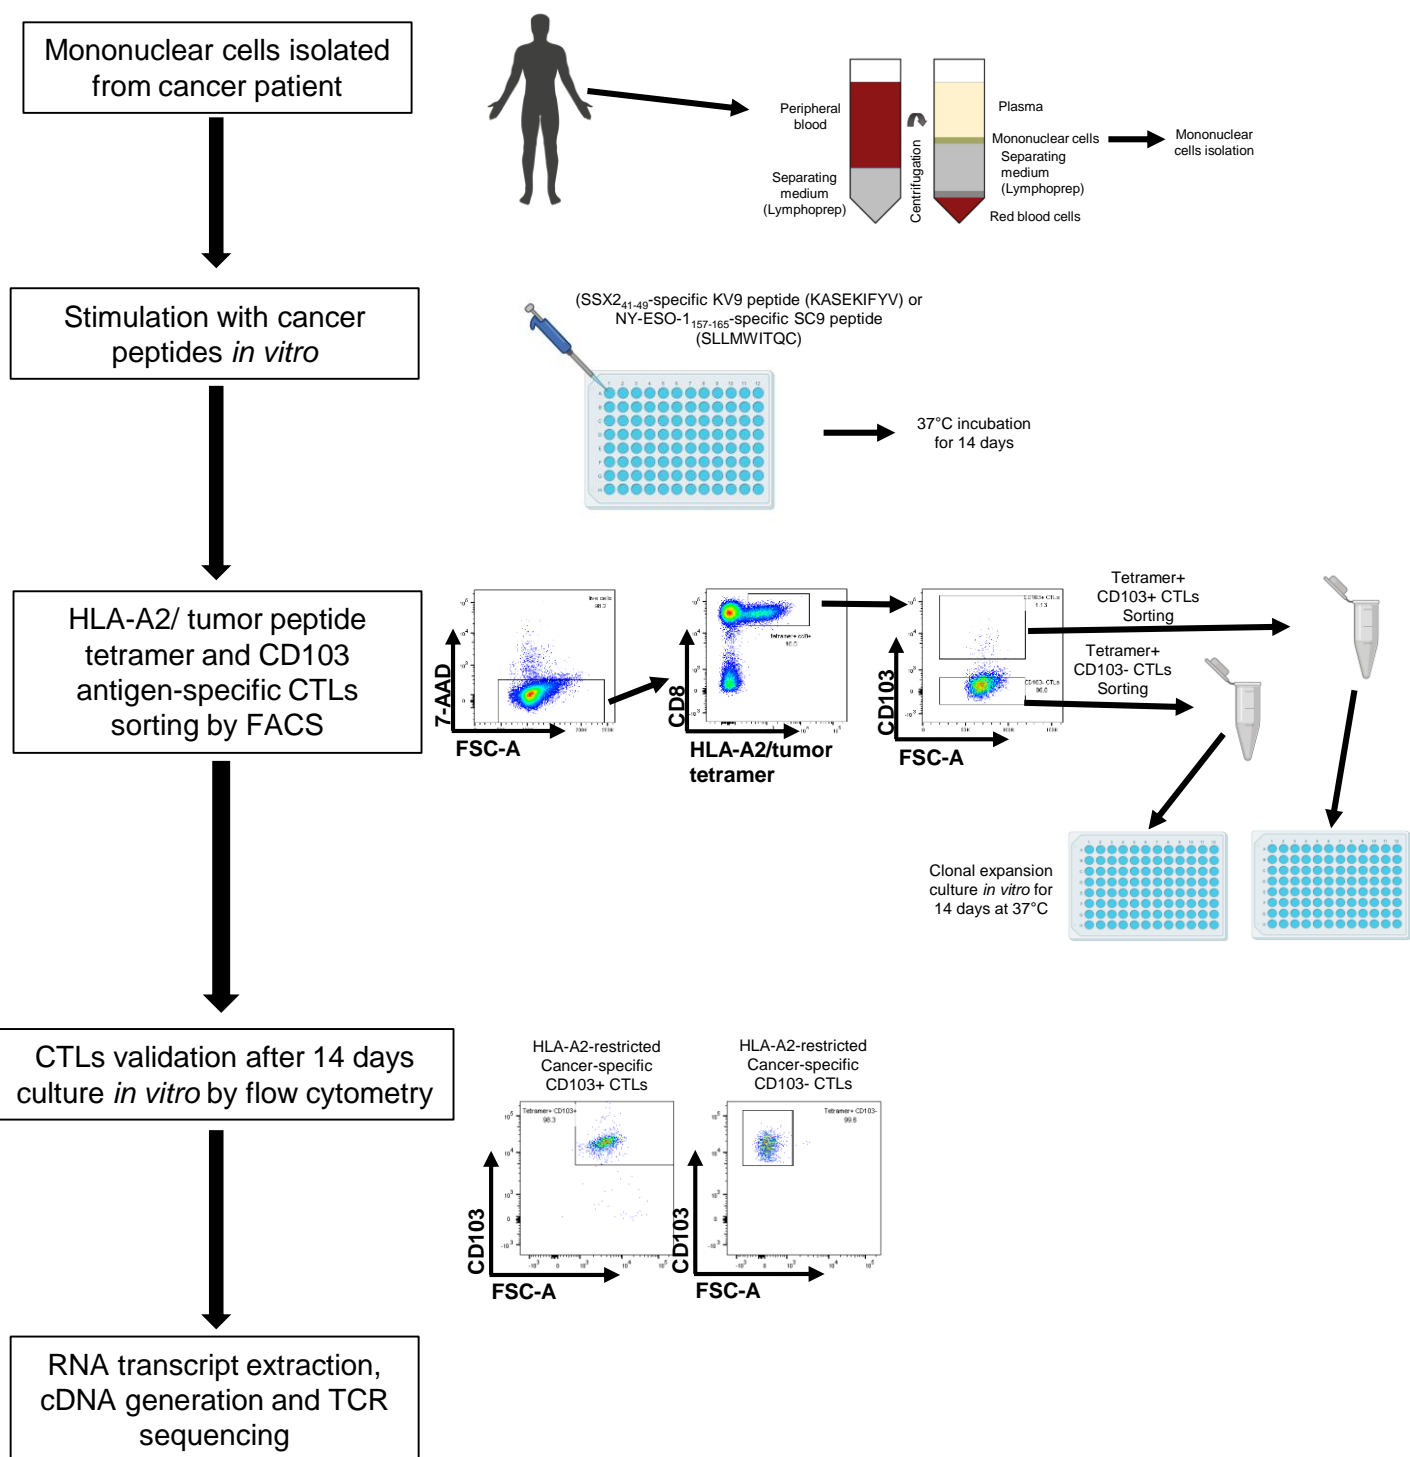

**Supplementary Fig. S1 Flowchart of identification, sorting and cloning of HLA-A2-restricted cancer-specific CTLs.** Mononuclear cells from cancer patient was initially isolated and stimulated with cancer peptides *in vitro* for 14 days at 37°C. After 14days, mononuclear cells were stained with HLA-A2/tumor peptide tetramer and CD103 and sorted for CD103+ and CD103- cancer-specific CTLs by FACS. Sorted cells were then clonally expanded *in vitro* for 14 days at 37°C. After 14 days, CD103 and tetramer specificity is validated using flow cytometry. Clonality of CTLs were determined by RNA transcript extraction, cDNA generation and subsequent TCR sequencing.

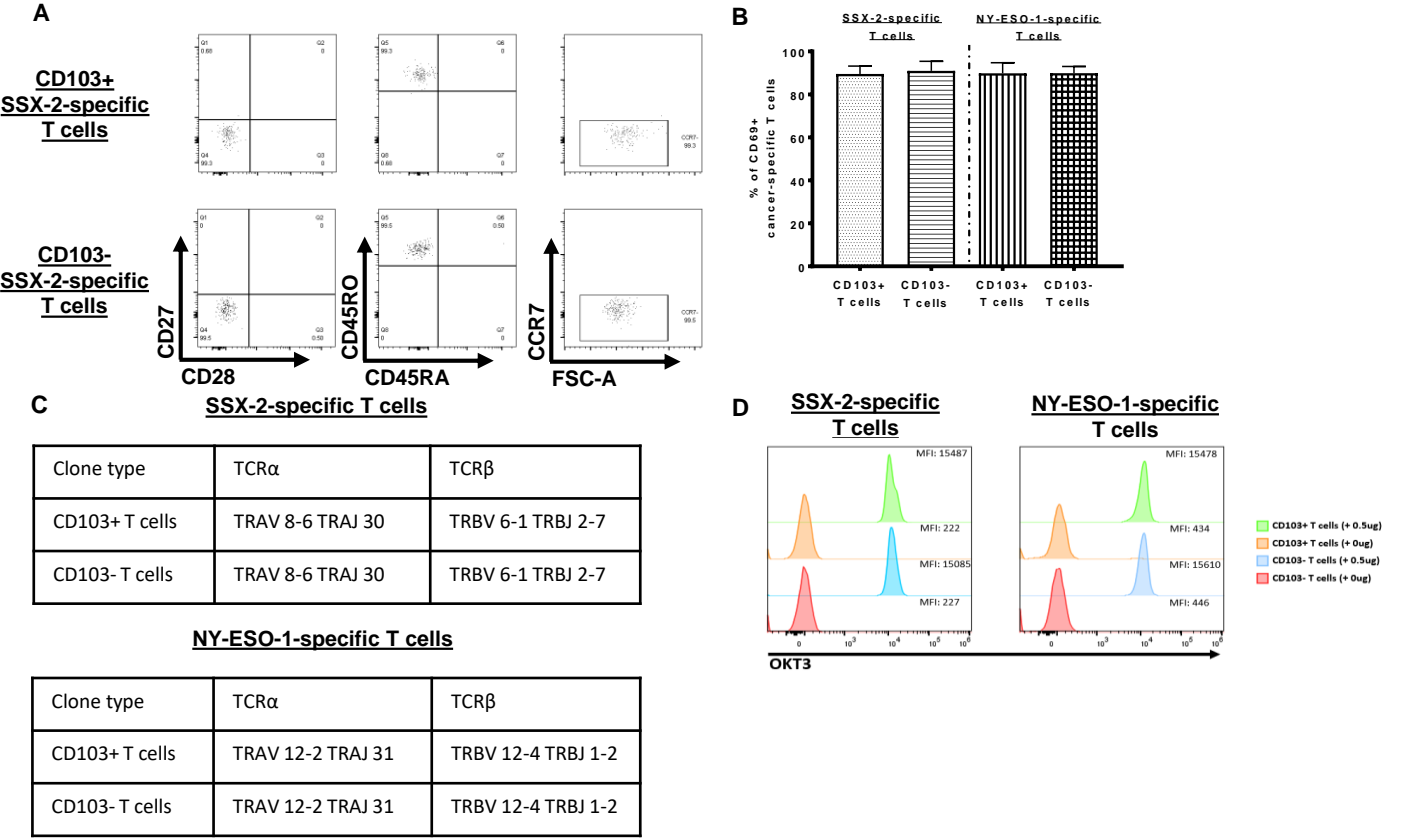

**Supplementary Fig. S2 Phenotype of paired CD103<sup>+</sup> and CD103<sup>-</sup> cancer-specific T cells.** A. Representative of FACS dot plots of the differentiation stage of CD103<sup>+</sup> and CD103<sup>-</sup> cancer-specific T cells (SSX-2-specific). B. The frequency of CD103<sup>+</sup> and CD103<sup>-</sup> cancer-specific T cells expressing the standard T<sub>rm</sub> marker of CD69. C. T cell receptor sequences of CD103<sup>+</sup> or CD103<sup>-</sup> T cells of SSX-2-specific (*top*) and NY-ESO-1-specific (*bottom*) T cells. D. T cell receptor densities (by OKT3 staining MFI) of either CD103<sup>+</sup> or CD103<sup>-</sup> T cells of SSX-2-specific T cells (*left*) or NY-ESO-1-specific T cells (*right*) following OKT3 binding staining of 0.5 $\mu$ g.

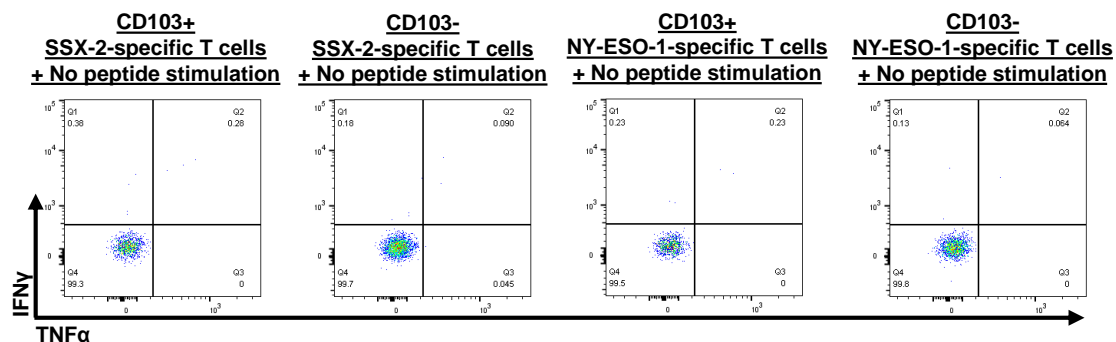

**Supplementary Fig. S3. T cell-mediated response of cancer-specific T cells without external antigen stimulation.** Flow cytometry plots of IFN $\gamma$  and TNF $\alpha$  responses by CD103+ of CD103- SSX-2-specific or NY-ESO-1-specific T cells following co-culture with **HCT116 cancer cell line** without external tumor antigen peptide stimulation.

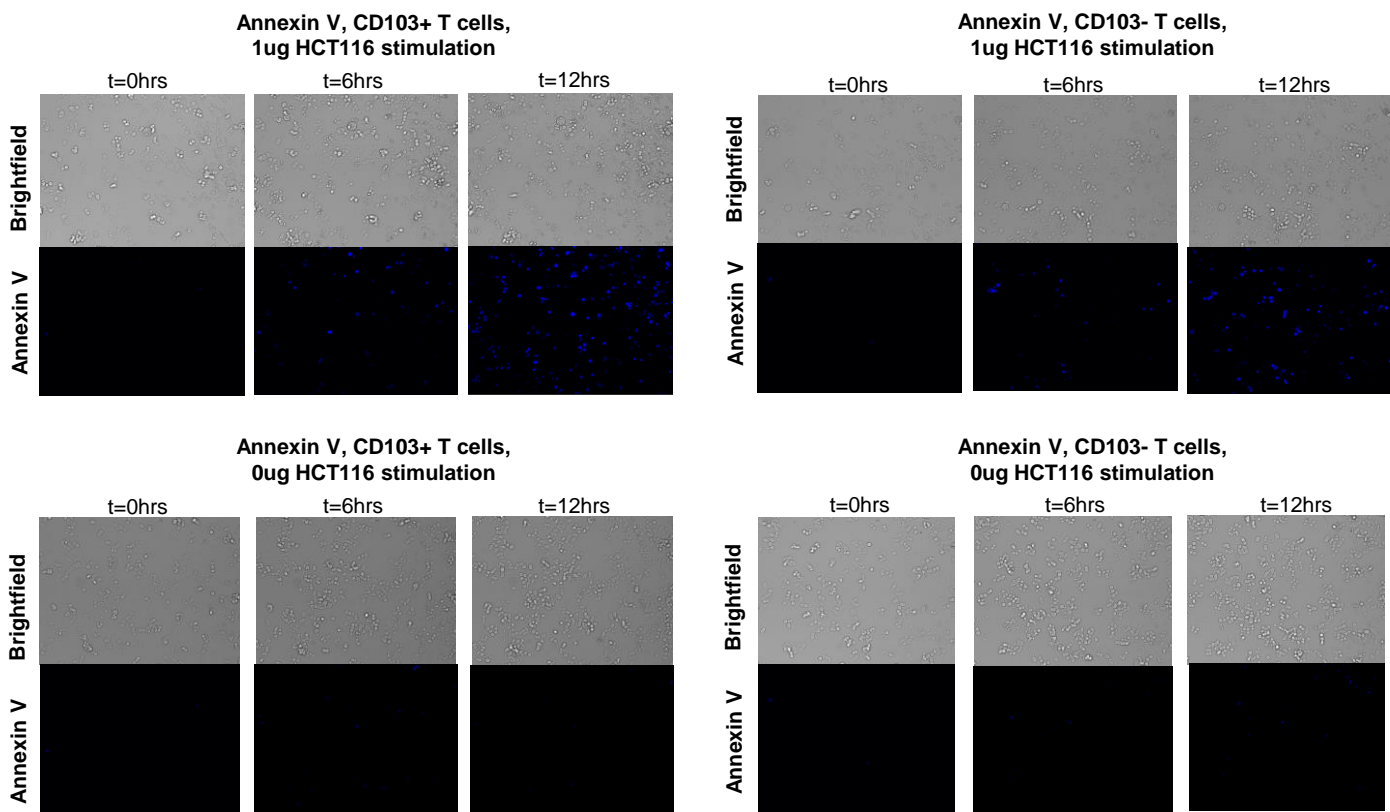

**Supplementary Fig. S4. T cell cytotoxic events.** Brightfield and Annexin V images of antigen stimulated HCT116 cell death following co-exposure with either CD103<sup>+</sup> (*left*) or CD103<sup>-</sup> (*right*) SSX-specific T cells at 0,6 and 12 hours, with 0μM-stimulated HCT116 co-culture as controls. Annexin V excited at 632nm excitation and illustrated in blue.

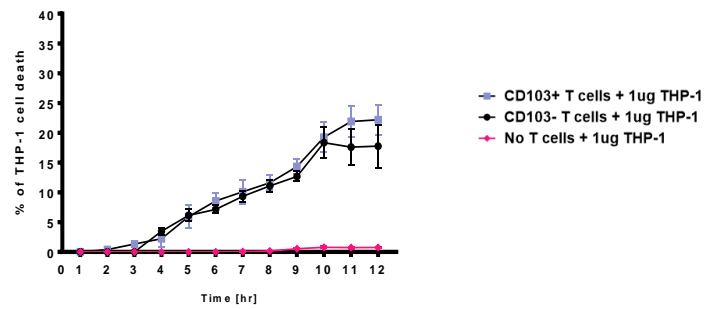

**Supplementary Fig. S5 Anti-tumor T cells cytotoxicity E-Cadherin- THP-1.** Percentage of THP-1 cell death across a 12-hour time period following co-culture with no T cells as controls. (N, number of repeats=3). Data represented as median±s.e.m.

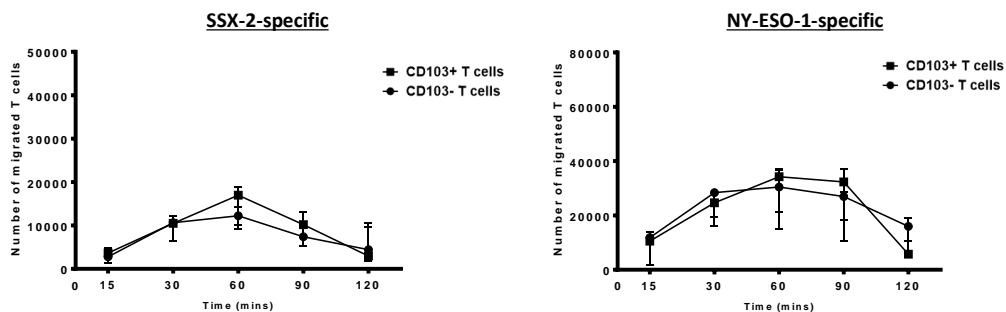

**Supplementary Fig. S6 CD103+ or CD103- cancer-specific T cells migration towards E-Cadherin- THP-1.** The number of T cells (either CD103+ or CD103- T cells) that migrated across a transwell membrane over a time period of 2 hours. SSX-2-specific T cell clones shown on the *left* and NY-ESO-1-specific T clones shown on the *right*. (N, number of repeats=3).

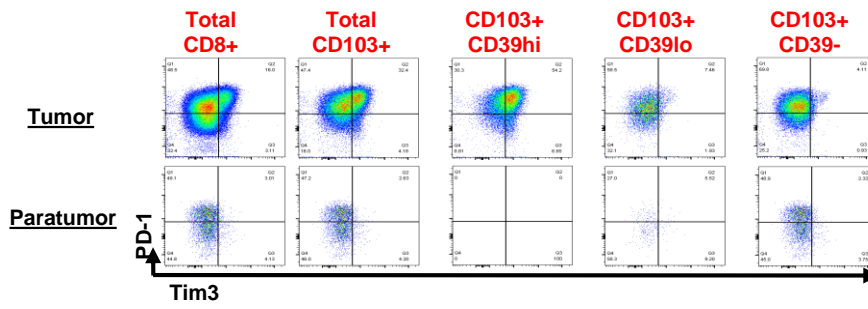

**Supplementary Fig. S7 *Ex vivo* phenotypic analysis of CD103<sup>+</sup> TILs.** Representative flow cytometry plot of CD103<sup>+</sup> CD39<sup>high</sup>, CD103<sup>+</sup> CD39<sup>low</sup>, CD103<sup>+</sup> CD39<sup>-</sup> or total CD8<sup>+</sup> T cells expressing either PD-1 or Tim3, derived from the paired tumor and paratumor tissue of one lung cancer patient.

Supplementary Table 1 Clinical parameters of cancer patients (for ex vivo analysis)

| Clinical parameters of cancer patients |                         |              |
|----------------------------------------|-------------------------|--------------|
| Age                                    | 40-59                   | 2            |
|                                        | 60-69                   | 1            |
|                                        | ≥70                     | 2            |
|                                        | average (range)         | 65.6 (59-80) |
|                                        | Total                   | 5            |
| Sex                                    | Male                    | 3            |
|                                        | Female                  | 2            |
| Tumor type                             | Lung                    | 5            |
| Tumor origin                           | metastatic              | 0            |
|                                        | non-metastatic          | 5            |
| Clinical tumor TNM stage               | T1N0M0                  | 4            |
|                                        | T2N1M0                  | 1            |
| Identification of cancer               | Adenocarcinoma          | 3            |
|                                        | Squamous cell carcinoma | 2            |

**Supplementary Table 2 TCR sequencing of T cell clones**

| Clone            | TRAV | CDR3(aa)          | TRAJ | TRBV | CDR3(aa)              | TRBJ |
|------------------|------|-------------------|------|------|-----------------------|------|
| SSX2_CD103-Pos   | 8-6  | CAVSDQNRDDKIIFGKG | 30   | 6-1  | CASSQGLTYGPSSYEQYFGPG | 2-7  |
| SSX2_CD103-Neg   | 8-6  | CAVSDQNRDDKIIFGKG | 30   | 6-1  | CASSQGLTYGPSSYEQYFGPG | 2-7  |
| Ny-ESO_CD103-Pos | 12-2 | CAVDNNARLMFGDG    | 31   | 12-4 | CASSQGAYGYTFGSG       | 1-2  |
| Ny-ESO_CD103-Neg | 12-2 | CAVDNNARLMFGDG    | 31   | 12-4 | CASSQGAYGYTFGSG       | 1-2  |
